# Supplementary material for: Antipsychotic Abuse, Dependence, and Withdrawal in the Pediatric Population: A Real-World Disproportionality Analysis
Source: MDPI journal article supplement (doi:10.3390/biomedicines10112972), 2022-11-18
Supplement: s1 [file s1]

**Table S1.** Reports of any adverse drug reaction involving risperidone, aripiprazole, quetiapine and olanzapine in children and adolescents (< 18 years old)

| Age range   | Risperidone | Aripiprazole | Quetiapine | Olanzapine |
|-------------|-------------|--------------|------------|------------|
| 0-23 months | 303         | 445          | 462        | 314        |
| 2-11 years  | 4,813       | 2,362        | 690        | 568        |
| 12-17 years | 6,700       | 3,904        | 2,568      | 2,401      |
| < 18 years  | 11,816      | 6,711        | 3,720      | 3,282      |

**Table S2.** Reported suspected antipsychotics in patients aged between 0 days and 23 months with abuse, dependence or withdrawal

| Drugs           | Number (%) |
|-----------------|------------|
| Quetiapine      | 75 (37.8)  |
| Aripiprazole    | 30 (15.2)  |
| Risperidone     | 28 (14.1)  |
| Olanzapine      | 20 (10.1)  |
| Chlorpromazine  | 17 (8.6)   |
| Cyamemazine     | 16 (8.1)   |
| Levomepromazine | 9 (4.5)    |
| Clozapine       | 8 (4.0)    |
| Haloperidol     | 8 (4.0)    |
| Amisulpride     | 4 (2.0)    |
| Zuclopenthixol  | 3 (1.5)    |
| Flupentixol     | 2 (1.0)    |
| Ziprasidone     | 2 (1.0)    |
| Chlorprothixene | 1 (0.5)    |
| Levosulpiride   | 1 (0.5)    |
| Loxapine        | 1 (0.5)    |
| Lurasidone      | 1 (0.5)    |
| Penfluridol     | 1 (0.5)    |
| Perphenazine    | 1 (0.5)    |
| Pipamperone     | 1 (0.5)    |
| Sulpiride       | 1 (0.5)    |
| Tiapride        | 1 (0.5)    |
| Melperone       | 1 (0.5)    |
| Trifluoperazine | 1 (0.5)    |

**Table S3.** Main Preferred Terms (PTs) reported in cases of abuse, dependence, or withdrawal in patients aged between 0 days and 23 months

| Preferred Term                            | Number (%) |
|-------------------------------------------|------------|
| Drug withdrawal syndrome neonatal         | 165 (83.3) |
| Drug withdrawal syndrome                  | 26 (13.1)  |
| Drug withdrawal headache                  | 1 (0.5)    |
| Drug dependence                           | 5 (2.5)    |
| Drug abuse                                | 2 (1.0)    |
| Neonatal complications of substance abuse | 1 (0.5)    |
| Intentional overdose                      | 1 (0.5)    |
| Intentional product misuse                | 1 (0.5)    |

**Table S4.** Reported suspected antipsychotics in patients aged between 2 and 11 years with abuse, dependence or withdrawal

| Drugs           | Number (%) |
|-----------------|------------|
| Risperidone     | 42 (45.2)  |
| Quetiapine      | 23 (24.7)  |
| Aripiprazole    | 13 (14.0)  |
| Olanzapine      | 10 (10.8)  |
| Paliperidone    | 3 (3.2)    |
| Cyamemazine     | 2 (2.2)    |
| Chlorpromazine  | 1 (1.1)    |
| Chlorprothixene | 1 (1.1)    |
| Haloperidol     | 1 (1.1)    |
| Pipamperone     | 1 (1.1)    |
| Clozapine       | 1 (1.1)    |
| Ziprasidone     | 1 (1.1)    |

**Table S5.** Main PTs reported in cases of abuse, dependence, or withdrawal in patients aged between 2 years and 11 years

| Preferred Term              | Number (%) |
|-----------------------------|------------|
| Intentional overdose        | 26 (28.0)  |
| Intentional product misuse  | 20 (21.5)  |
| Drug withdrawal syndrome    | 36 (38.7)  |
| Drug withdrawal convulsions | 1 (1.1)    |
| Drug abuse                  | 8 (8.6)    |
| Drug dependence             | 2 (1.1)    |

**Table S6.** Reported suspected antipsychotics in patients aged between 12 and 17 years with abuse, dependence or withdrawal

| <b>Drugs</b>     | <b>Number (%)</b> |
|------------------|-------------------|
| Quetiapine       | 270 (36.9)        |
| Risperidone      | 154 (21.0)        |
| Olanzapine       | 88 (12.0)         |
| Aripiprazole     | 86 (11.7)         |
| Clozapine        | 29 (4.0)          |
| Promazine        | 29 (4.0)          |
| Chlorprothixene  | 25 (3.4)          |
| Haloperidol      | 21 (2.9)          |
| Cyamemazine      | 19 (2.6)          |
| Pipamperone      | 16 (2.2)          |
| Ziprasidone      | 15 (2.0)          |
| Amisulpride      | 8 (1.1)           |
| Levomepromazine  | 5 (0.7)           |
| Lurasidone       | 5 (0.7)           |
| Paliperidone     | 5 (0.7)           |
| Chlorpromazine   | 4 (0.5)           |
| Perazine         | 4 (0.5)           |
| Sulpiride        | 4 (0.5)           |
| Clotiapine       | 3 (0.4)           |
| Thioridazine     | 3 (0.4)           |
| Zuclopenthixol   | 3 (0.4)           |
| Asenapine        | 2 (0.3)           |
| Flupentixol      | 2 (0.3)           |
| Fluphenazine     | 2 (0.3)           |
| Loxapine         | 2 (0.3)           |
| Prothipendyl     | 2 (0.3)           |
| Melperone        | 1 (0.1)           |
| Droperidol       | 1 (0.1)           |
| Levosulpiride    | 1 (0.1)           |
| Periciazine      | 1 (0.1)           |
| Prochlorperazine | 1 (0.1)           |
| Tiapride         | 1 (0.1)           |

**Table S7.** Main PTs reported in cases of abuse, dependence, or withdrawal in patients aged between 12 years and 17 years

| <b>Preferred Term</b>       | <b>Number (%)</b> |
|-----------------------------|-------------------|
| Intentional overdose        | 440 (60.1)        |
| Intentional product misuse  | 105 (14.3)        |
| Drug abuse                  | 112 (15.3)        |
| Drug dependence             | 22 (3.0)          |
| Substance abuse             | 20 (2.7)          |
| Drug abuser                 | 5 (0.7)           |
| Drug use disorder           | 4 (0.5)           |
| Substance abuser            | 3 (0.4)           |
| Substance dependence        | 1 (0.1)           |
| Substance use disorder      | 1 (0.1)           |
| Drug withdrawal syndrome    | 62 (8.5)          |
| Drug withdrawal headache    | 2 (0.3)           |
| Drug withdrawal convulsions | 1 (0.1)           |
